# Supplementary material for: Review of One Health in the Galápagos Islands (Part 1): Historical Perspective, Invasive Species, and Emerging Infectious Diseases
Source: Preprints.org preprint supplement (doi:10.20944/preprints202311.0775.v2), 2024-08-16
Supplement: Supplementary file 1 [file supplementary]

## Sheet: Key
IUCN Threatened Categories - pre-1994		Definition
Threatened Species	T	Encompasses all the below categories
Endangered	E	"Taxa in danger of extinction and whose survival is unlikely if the causal factors continue operating."
Vulnerable	V	"Taxa believed likely to move into the 'Endangered' category in the near future if the causal factors continue operating."
Rare	R	"Taxa with small world populations that are not at present 'Endangered' or 'Vulnerable', but are at risk.
Indeterminate	I	"Taxa known to be 'Endangered', 'Vulnerable' or 'Rare' but where there is not enough information to say which of the three categories is appropriate."
Insufficiently Known	K	"Taxa that are suspected but not definitely known to belong to any of the above categories, because of lack of information."
Extinct	Ex	"Species not definitely located in the wild during the past 50 years."
Commercially Threatened	CT	"Taxa not currently threatened with extinction, but most or all of whose populations are threatened as a sustainable commercial resource, or will become so, unless their exploitation is regulated."
Reference: 1994 IUCN Red List of Threatened Animals
IUCN Threatened Categories: post-1994
Extinct	EX
Extinct in the Wild	EW
Critically Endangered	CR
Endangered	EN
Vulnerable	VU
Near Threatened	NT
Least Concern	LC
Data Deficient	DD
https://portals.iucn.org/library/sites/library/files/documents/RL-2001-001-2nd.pdf

## Sheet: Mammals
Scientific name	Common name	First described	Origin	IUCN Assessment Year
				1994	1996	2000	2002	2003	2004	2005	2006	2007	2008	2009	2010	2011	2012	2013	2014	2015	2016	2017	2018	2019	2020	2021		IUCN CITATION - accessed May 8 2023; updated August 3, 2024
Arctocephalus galapagoensis	Galápagos fur seal	1904	Endemic		VU								EN						EN									Trillmich, F. 2015. Arctocephalus galapagoensis. The IUCN Red List of Threatened Species 2015: e.T2057A45223722. http://dx.doi.org/10.2305/IUCN.UK.2015-2.RLTS.T2057A45223722.en
Zalophus wollebaeki	Galápagos sea lion	1953	Endemic		VU								EN						EN									Trillmich, F. 2015. Zalophus wollebaeki. The IUCN Red List of Threatened Species 2015: e.T41668A45230540. http://dx.doi.org/10.2305/IUCN.UK.2015-2.RLTS.T41668A45230540.en
Aegialomys galapagoensis	Galápagos rice rat	1839	Endemic		CR		VU						VU										VU					Weksler, M. 2018. Aegialomys galapagoensis. The IUCN Red List of Threatened Species 2018: e.T15595A22336232. http://dx.doi.org/10.2305/IUCN.UK.2018-1.RLTS.T15595A22336232.en
Nesoryzomys fernandinae	Fernandina rice rat	1979	Endemic		EX	VU							VU									VU						Dowler, R. & Weksler, M. 2018. Nesoryzomys fernandinae. The IUCN Red List of Threatened Species 2018: e.T14707A22390507. http://dx.doi.org/10.2305/IUCN.UK.2018- 1.RLTS.T14707A22390507.en
Nesoryzomys narboroughi	Large Fernandina rice rat	1904	Endemic				NT						VU									VU						Dowler, R. & Weksler, M. 2018. Nesoryzomys narboroughi. The IUCN Red List of Threatened Species 2018: e.T40765A22390714. http://dx.doi.org/10.2305/IUCN.UK.2018- 1.RLTS.T40765A22390714.en
Nesoryzomys swarthi	Santiago Galápagos mouse	1938	Endemic		EX	VU							VU									VU						Dowler, R. & Weksler, M. 2018. Nesoryzomys swarthi. The IUCN Red List of Threatened Species 2018: e.T14709A22390617. https://dx.doi.org/10.2305/IUCN.UK.2018-1.RLTS.T14709A22390617.en. Accessed on 03 August 2024.
Balaenoptera borealis	Sei whale	1828	Native	VU	EN								EN										EN					Cooke, J.G. 2018. Balaenoptera borealis. The IUCN Red List of Threatened Species 2018: e.T2475A130482064. http://dx.doi.org/10.2305/IUCN.UK.2018-2.RLTS.T2475A130482064.en
Balaenoptera physalus	Fin whale	1758	Native	VU	EN								EN					EN					VU					Cooke, J.G. 2018. Balaenoptera physalus. The IUCN Red List of Threatened Species 2018: e.T2478A50349982. http://dx.doi.org/10.2305/IUCN.UK.2018-2.RLTS.T2478A50349982.en
Balaenoptera musculus	Blue whale	1758	Migrant	EN	EN								EN										EN					Cooke, J.G. 2018. Balaenoptera musculus (errata version published in 2019). The IUCN Red List of Threatened Species 2018: e.T2477A156923585. http://dx.doi.org/10.2305/IUCN.UK.2018- 2.RLTS.T2477A156923585.en
Balaenoptera musculus ssp. intermedia	Antarctic blue whale	1871	Migrant		EN								CR										CR					Cooke, J.G. 2018. Balaenoptera musculus ssp. intermedia. The IUCN Red List of Threatened Species 2018: e.T41713A50226962. http://dx.doi.org/10.2305/IUCN.UK.2018- 2.RLTS.T41713A50226962.en
Lasiurus borealis brachyotis	Galapagos red bat	1998	Endemic																									No IUCN listing; https://www.darwinfoundation.org/en/datazone/checklist?species=5220
Aeorestes villosissimus villosissimus / Lasiurus cinereus	Hoary bat	1806	Native		LC								LC							LC								Gonzalez, E., Barquez, R. & Arroyo-Cabrales, J. 2016. Lasiurus cinereus. The IUCN Red List of Threatened Species 2016: e.T11345A22120305. https://dx.doi.org/10.2305/IUCN.UK.2016-1.RLTS.T11345A22120305.en. Accessed on 01 November 2023.

## Sheet: Reptiles
Scientific name	Common name	First described	Origin	IUCN Assessment Year
				1994	1996	2000	2002	2003	2004	2005	2006	2007	2008	2009	2010	2011	2012	2013	2014	2015	2016	2017	2018	2019	2020	2021		IUCN CITATION - accessed May 8, 2023; updated August 9, 2024
Chelonoidis becki	Volcán Wolf giant tortoise	1901	Endemic		VU																VU							Caccone, A., Cayot, L.J., Gibbs, J.P. & Tapia, W. 2017. Chelonoidis becki. The IUCN Red List of Threatened Species 2017: e.T9018A82426296. http://dx.doi.org/10.2305/IUCN.UK.2017- 3.RLTS.T9018A82426296.en
Chelonoidis chathamensis	San Cristóbal giant tortoise	1907	Endemic		VU																	EN						Caccone, A., Cayot, L.J., Gibbs, J.P. & Tapia, W. 2017. Chelonoidis chathamensis. The IUCN Red List of Threatened Species 2017: e.T9019A82688009. http://dx.doi.org/10.2305/IUCN.UK.2017- 3.RLTS.T9019A82688009.en
Chelonoidis darwini	Santiago giant tortoise	1907	Endemic		EN															CR								Cayot, L.J., Gibbs, J.P., Tapia, W. & Caccone, A. 2022. Chelonoidis darwini (amended version of 2016 assessment). The IUCN Red List of Threatened Species 2022: e.T9020A217759496. https://dx.doi.org/10.2305/IUCN.UK.2022-1.RLTS.T9020A217759496.en
Chelonoidis donfaustoi	Eastern Santa Cruz giant tortoise	1903	Endemic		EN															CR								Cayot, L.J., Gibbs, J.P., Tapia, W. & Caccone, A. 2017. Chelonoidis donfaustoi. The IUCN Red List of Threatened Species 2017: e.T90377132A90377135. http://dx.doi.org/10.2305/IUCN.UK.2017-3.RLTS.T90377132A90377135.en
Chelonoidis duncanensis	Pinzón giant tortoise	1896	Endemic		EW							EW								VU								Cayot, L.J., Gibbs, J.P., Tapia, W. & Caccone, A. 2017. Chelonoidis duncanensis. The IUCN Red List of Threatened Species 2017: e.T9021A3149054. http://dx.doi.org/10.2305/IUCN.UK.2017- 3.RLTS.T9021A3149054.en
Chelonoidis guntheri	Sierra Negra giant tortoise	1889	Endemic		EN															CR								Cayot, L.J., Gibbs, J.P., Tapia, W. & Caccone, A. 2018. Chelonoidis guntheri. The IUCN Red List of Threatened Species 2018: e.T9022A116505802. http://dx.doi.org/10.2305/IUCN.UK.2018- 2.RLTS.T9022A116505802.en
Chelonoidis hoodensis	Española giant tortoise	1907	Endemic		CR															CR								Cayot, L.J., Gibbs, J.P., Tapia, W. & Caccone, A. 2017. Chelonoidis hoodensis. The IUCN Red List of Threatened Species 2017: e.T9024A82777079. http://dx.doi.org/10.2305/IUCN.UK.2017- 3.RLTS.T9024A82777079.en
Chelonoidis microphyes	Volcán Darwin giant tortoise	1875	Endemic		VU																EN							Cayot, L.J., Gibbs, J.P., Tapia, W. & Caccone, A. 2018. Chelonoidis microphyes. The IUCN Red List of Threatened Species 2018: e.T9025A116506297. http://dx.doi.org/10.2305/IUCN.UK.2018- 2.RLTS.T9025A116506297.en
Chelonoidis phantasticus	Fernandina giant tortoise	1907	Endemic																	CR								Rhodin, A.G.J., Gibbs, J.P., Cayot, L.J., Kiester, A.R. & Tapia, W. 2017. Chelonoidis phantasticus (errata version published in 2018). The IUCN Red List of Threatened Species 2017: e.T170517A128969920. http://dx.doi.org/10.2305/IUCN.UK.2017-3.RLTS.T170517A1315907.en
Chelonoidis porteri	Western Santa Cruz giant tortoise	1903	Endemic		EN																CR							Cayot, L.J., Gibbs, J.P., Tapia, W. & Caccone, A. 2017. Chelonoidis porteri. The IUCN Red List of Threatened Species 2017: e.T9026A82777132. http://dx.doi.org/10.2305/IUCN.UK.2017- 3.RLTS.T9026A82777132.en
Chelonoidis vandenburghi	Volcán Alcedo giant tortoise	1930	Endemic		VU																VU							Cayot, L.J., Gibbs, J.P., Tapia, W. & Caccone, A. 2018. Chelonoidis vandenburghi (errata version published in 2019). The IUCN Red List of Threatened Species 2018: e.T9027A144766471. http://dx.doi.org/10.2305/IUCN.UK.2018-2.RLTS.T9027A144766471.en
Chelonoidis vicina	Cerro Azul giant tortoise	1875	Endemic		EN																EN							Cayot, L.J., Gibbs, J.P., Tapia, W. & Caccone, A. 2018. Chelonoidis vicina (errata version published in 2019). The IUCN Red List of Threatened Species 2018: e.T9028A144765855. http://dx.doi.org/10.2305/IUCN.UK.2018-2.RLTS.T9028A144765855.en
Amblyrhynchus cristatus ssp. cristatus	Isabela and Fernandina iguana	1825	Endemic	NT	VU				VU															VU				MacLeod, A., Nelson, K.N. & Grant, T.D. 2020. Amblyrhynchus cristatus (errata version published in 2020). The IUCN Red List of Threatened Species 2020: e.T1086A177552193. https://dx.doi.org/10.2305/IUCN.UK.2020-2.RLTS.T1086A177552193.en
Amblyrhynchus cristatus ssp. trillmichi	Santa Fé marine iguana	2017	Endemic																					CR				MacLeod, A., Nelson, K.N. & Grant, T.D. 2020. Amblyrhynchus cristatus ssp. trillmichi (errata version published in 2020). The IUCN Red List of Threatened Species 2020: e.T152331440A177568544. https://dx.doi.org/10.2305/IUCN.UK.2020-2.RLTS.T152331440A177568544.en. Accessed on 10 August 2024.
Amblyrhynchus cristatus ssp. hayampi	Marchena marine iguana	2017	Endemic																					EN				MacLeod, A., Nelson, K.N. & Grant, T.D. 2020. Amblyrhynchus cristatus ssp. hayampi (errata version published in 2020). The IUCN Red List of Threatened Species 2020: e.T152331100A177568097. https://dx.doi.org/10.2305/IUCN.UK.2020-2.RLTS.T152331100A177568097.en. Accessed on 10 August 2024.
Amblyrhynchus cristatus ssp. hassi	Santa Cruz marine iguana	1962	Endemic																					EN				MacLeod, A., Nelson, K.N. & Grant, T.D. 2020. Amblyrhynchus cristatus ssp. hassi (errata version published in 2020). The IUCN Red List of Threatened Species 2020: e.T44175A177564513. https://dx.doi.org/10.2305/IUCN.UK.2020-2.RLTS.T44175A177564513.en. Accessed on 10 August 2024.
Amblyrhynchus cristatus ssp. jeffreysi	Wolf marine iguana	2017	Endemic																					EN				MacLeod, A., Nelson, K.N. & Grant, T.D. 2020. Amblyrhynchus cristatus ssp. jeffreysi (errata version published in 2020). The IUCN Red List of Threatened Species 2020: e.T152331073A177567657. https://dx.doi.org/10.2305/IUCN.UK.2020-2.RLTS.T152331073A177567657.en. Accessed on 10 August 2024.
Amblyrhynchus cristatus ssp. godzilla	Punta Pitt marine iguana	2017	Endemic																					CR				MacLeod, A., Nelson, K.N. & Grant, T.D. 2020. Amblyrhynchus cristatus ssp. godzilla (errata version published in 2020). The IUCN Red List of Threatened Species 2020: e.T152330878A177567061. https://dx.doi.org/10.2305/IUCN.UK.2020-2.RLTS.T152330878A177567061.en. Accessed on 10 August 2024.
Amblyrhynchus cristatus ssp. sielmanni	Pinta marine iguana	1962	Endemic																					CR				MacLeod, A., Nelson, K.N. & Grant, T.D. 2020. Amblyrhynchus cristatus ssp. sielmanni (errata version published in 2020). The IUCN Red List of Threatened Species 2020: e.T44178A177566053. https://dx.doi.org/10.2305/IUCN.UK.2020-2.RLTS.T44178A177566053.en. Accessed on 10 August 2024.
Amblyrhynchus cristatus ssp. wikelskii	Santiago marine iguana	2017	Endemic																					EN				MacLeod, A., Nelson, K.N. & Grant, T.D. 2020. Amblyrhynchus cristatus ssp. wikelskii (errata version published in 2020). The IUCN Red List of Threatened Species 2020: e.T152331459A177569043. https://dx.doi.org/10.2305/IUCN.UK.2020-2.RLTS.T152331459A177569043.en. Accessed on 10 August 2024.
Amblyrhynchus cristatus ssp. venustissimus	Española marine iguana	1956	Endemic																					EN				MacLeod, A., Nelson, K.N. & Grant, T.D. 2020. Amblyrhynchus cristatus ssp. venustissimus (errata version published in 2020). The IUCN Red List of Threatened Species 2020: e.T175537718A177566513. https://dx.doi.org/10.2305/IUCN.UK.2020-2.RLTS.T175537718A177566513.en. Accessed on 10 August 2024.
Amblyrhynchus cristatus ssp. nanus	Genovesa marine iguana	1892	Endemic																					CR				MacLeod, A., Nelson, K.N. & Grant, T.D. 2020. Amblyrhynchus cristatus ssp. nanus (errata version published in 2020). The IUCN Red List of Threatened Species 2020: e.T44177A177565612. https://dx.doi.org/10.2305/IUCN.UK.2020-2.RLTS.T44177A177565612.en. Accessed on 10 August 2024.
Amblyrhynchus cristatus ssp. mertensi	San Cristóbal marine iguana	1962	Endemic																					EN				MacLeod, A., Nelson, K.N. & Grant, T.D. 2020. Amblyrhynchus cristatus ssp. mertensi (errata version published in 2020). The IUCN Red List of Threatened Species 2020: e.T152329949A177565047. https://dx.doi.org/10.2305/IUCN.UK.2020-2.RLTS.T152329949A177565047.en. Accessed on 10 August 2024.
Conolophus marthae	Galápagos pink land iguana	1986	Endemic														CR											Gentile, G. 2012. Conolophus marthae. The IUCN Red List of Threatened Species 2012: e.T174472A1414375. http://dx.doi.org/10.2305/IUCN.UK.2012-1.RLTS.T174472A1414375.en
Conolophus pallidus	Santa Fe land iguana	1903	Endemic	NT	VU																			VU				Gentile, G. & Grant, T.D. 2020. Conolophus pallidus. The IUCN Red List of Threatened Species 2020: e.T5239A3014028. https://dx.doi.org/10.2305/IUCN.UK.2020- 2.RLTS.T5239A3014028.en
Conolophus subcristatus	Galápagos land iguana	1831	Endemic	VU	VU																			VU				Kumar, K., Gentile, G. & Grant, T.D. 2020. Conolophus subcristatus. The IUCN Red List of Threatened Species 2020: e.T5240A3014082. https://dx.doi.org/10.2305/IUCN.UK.2020- 2.RLTS.T5240A3014082.en
Microlophus bivittatus	San Cristóbal lava lizard	1871	Endemic																NT									Márquez, C. & Cisneros-Heredia, D.F. 2022. Microlophus bivittatus (amended version of 2016 assessment). The IUCN Red List of Threatened Species 2022: e.T48444538A217809016. https://dx.doi.org/10.2305/IUCN.UK.2022-1.RLTS.T48444538A217809016.en
Microlophus duncanensis	Pinzón lava lizard	1890	Endemic																		NT							Márquez, C. & Cisneros-Heredia, D.F. 2016. Microlophus duncanensis. The IUCN Red List of Threatened Species 2016: e.T48444650A48444714. http://dx.doi.org/10.2305/IUCN.UK.2016- 1.RLTS.T48444650A48444714.en
Microlophus grayii	Floreana lava lizard	1843	Endemic																NT									Márquez, C. & Cisneros-Heredia, D.F. 2016. Microlophus grayii. The IUCN Red List of Threatened Species 2016: e.T48444750A48444762. http://dx.doi.org/10.2305/IUCN.UK.2016- 1.RLTS.T48444750A48444762.en
Phyllodactylus darwini	Darwin's leaf-toed gecko	1942	Endemic																NT									Márquez, C., Yánez-Muñoz, M. & Cisneros-Heredia, D.F. 2022. Phyllodactylus darwini (amended version of 2016 assessment). The IUCN Red List of Threatened Species 2022: e.T48443561A217808624. https://dx.doi.org/10.2305/IUCN.UK.2022- 1.RLTS.T48443561A217808624.en
Phyllodactylus galapagensis	Galápagos leaf-toed gecko	1869	Endemic																NT									Márquez, C., Yánez-Muñoz, M. & Cisneros-Heredia, D.F. 2016. Phyllodactylus galapagensis. The IUCN Red List of Threatened Species 2016: e.T48443616A48443620. http://dx.doi.org/10.2305/IUCN.UK.2016-1.RLTS.T48443616A48443620.en
Phyllodactylus leei	San Cristóbal Island Leaf-toed Gecko	1889	Endemic												VU				NT									Cisneros-Heredia, D.F. & Márquez, C. 2016. Phyllodactylus leei. The IUCN Red List of Threatened Species 2016: e.T178276A56282962. http://dx.doi.org/10.2305/IUCN.UK.2016- 1.RLTS.T178276A56282962.en
Pseudalsophis biserialis	Galápagos racer	1860	Endemic																NT									Márquez, C., Cisneros-Heredia, D.F. & Yánez-Muñoz, M. 2017. Pseudalsophis biserialis. The IUCN Red List of Threatened Species 2017: e.T190541A56253872. http://dx.doi.org/10.2305/IUCN.UK.2017-2.RLTS.T190541A56253872.en
Pseudalsophis hoodensis	Española racer	1912	Endemic																NT									Cisneros-Heredia, D.F. & Márquez, C. 2017. Pseudalsophis hoodensis. The IUCN Red List of Threatened Species 2017: e.T190539A54447664. http://dx.doi.org/10.2305/IUCN.UK.2017- 2.RLTS.T190539A54447664.en
Pseudalsophis slevini	Banded Galápagos snake	1912	Endemic																VU									Márquez, C. & Cisneros-Heredia, D.F. 2019. Pseudalsophis slevini. The IUCN Red List of Threatened Species 2019: e.T190543A54447674. https://dx.doi.org/10.2305/IUCN.UK.2019- 3.RLTS.T190543A54447674.en
Pseudalsophis steindachneri	Striped Galápagos snake	1912	Endemic																NT									Cisneros-Heredia, D.F. & Márquez, C. 2017. Pseudalsophis steindachneri. The IUCN Red List of Threatened Species 2017: e.T190542A54447669. http://dx.doi.org/10.2305/IUCN.UK.2017- 2.RLTS.T190542A54447669.en
Caretta caretta	Loggerhead sea turtle	1758	Native	VU	EN															VU								Casale, P. & Tucker, A.D. 2017. Caretta caretta. The IUCN Red List of Threatened Species 2017: e.T3897A119333622. http://dx.doi.org/10.2305/IUCN.UK.2017-2.RLTS.T3897A119333622.en
Chelonia mydas	East Pacific green turtle	1758	Native	EN	EN				EN																			Seminoff, J.A. (Southwest Fisheries Science Center, U.S.). 2004. Chelonia mydas. The IUCN Red List of Threatened Species 2004: e.T4615A11037468. http://dx.doi.org/10.2305/IUCN.UK.2004.RLTS.T4615A11037468.en
Dermochelys coriacea	Leatherback turtle	1761	Migrant	EN	EN	CR												VU										Wallace, B.P., Tiwari, M. & Girondot, M. 2013. Dermochelys coriacea. The IUCN Red List of Threatened Species 2013: e.T6494A43526147. http://dx.doi.org/10.2305/IUCN.UK.2013- 2.RLTS.T6494A43526147.en
Eretmochelys imbricata	Hawksbill turtle	1766	Migrant	EN	CR								CR															Mortimer, J.A & Donnelly, M. (IUCN SSC Marine Turtle Specialist Group). 2008. Eretmochelys imbricata. The IUCN Red List of Threatened Species 2008: e.T8005A12881238. http://dx.doi.org/10.2305/IUCN.UK.2008.RLTS.T8005A12881238.en
Lepidochelys olivacea	Olive Ridley turtle	1829	Migrant	EN	EN								VU															Abreu-Grobois, A & Plotkin, P. (IUCN SSC Marine Turtle Specialist Group). 2008. Lepidochelys olivacea. The IUCN Red List of Threatened Species 2008: e.T11534A3292503. http://dx.doi.org/10.2305/IUCN.UK.2008.RLTS.T11534A3292503.en
Podocnemis unifilis	Yellow-spotted river turtle	1848	Introduced	VU	VU																							Tortoise & Freshwater Turtle Specialist Group. 1996. Podocnemis unifilis. The IUCN Red List of Threatened Species 1996: e.T17825A97397562. http://dx.doi.org/10.2305/IUCN.UK.1996.RLTS.T17825A7506933.en

## Sheet: Birds
Scientific name	Common name	First described	Origin	IUCN Assessment Year
				1994	1996	2000	2002	2003	2004	2005	2006	2007	2008	2009	2010	2011	2012	2013	2014	2015	2016	2017	2018	2019	2020	2021		IUCN CITATION - accessed May 8 2023
Buteo galapagoensis	Galápagos hawk	1837	Endemic	VU	VU	VU			VU		VU		VU				VU				VU					VU		BirdLife International. 2021. Buteo galapagoensis. The IUCN Red List of Threatened Species 2021: e.T22695909A194428673. https://dx.doi.org/10.2305/IUCN.UK.2021- 3.RLTS.T22695909A194428673.en
Certhidea olivacea	Green warbler finch	1837	Endemic																		LC	VU						BirdLife International. 2017. Certhidea olivacea. The IUCN Red List of Threatened Species 2017: e.T103814223A119095821. http://dx.doi.org/10.2305/IUCN.UK.2017- 3.RLTS.T103814223A119095821.en
Geospiza heliobates	Mangrove finch	1901	Endemic	EN	EN	CR			CR				CR	CR	CR		CR	CR		CR	CR		CR			CR		BirdLife International. 2021. Geospiza heliobates. The IUCN Red List of Threatened Species 2021: e.T22723786A182523098. https://dx.doi.org/10.2305/IUCN.UK.2021- 3.RLTS.T22723786A182523098.en
Geospiza acutirostris	Genovesa ground finch	1894	Endemic																		VU	VU			VU			BirdLife International. 2020. Geospiza acutirostris. The IUCN Red List of Threatened Species 2020: e.T103815404A182443041. https://dx.doi.org/10.2305/IUCN.UK.2020- 3.RLTS.T103815404A182443041.en
Geospiza conirostris	Española cactus finch	1890	Endemic																		VU	VU			VU			BirdLife International. 2020. Geospiza conirostris. The IUCN Red List of Threatened Species 2020: e.T103815509A182514440. https://dx.doi.org/10.2305/IUCN.UK.2020- 3.RLTS.T103815509A182514440.en
Geospiza pallida	Woodpecker finch	1870	Endemic	U		U			LC				LC	LC			LC			VU	VU					NT		BirdLife International. 2021. Geospiza pallida. The IUCN Red List of Threatened Species 2021: e.T22723783A167283265. https://dx.doi.org/10.2305/IUCN.UK.2021- 3.RLTS.T22723783A167283265.en
Geospiza pauper	Medium tree finch	1890	Endemic	U		VU			VU				VU	VU	VU		VU	VU		VU	VU		CR					BirdLife International. 2018. Geospiza pauper. The IUCN Red List of Threatened Species 2018: e.T22723773A130488958. http://dx.doi.org/10.2305/IUCN.UK.2018- 2.RLTS.T22723773A130488958.en
Geospiza propinqua	Genovesa cactus finch	1894	Endemic																		VU	VU			VU			BirdLife International. 2020. Geospiza propinqua. The IUCN Red List of Threatened Species 2020: e.T103815544A182516621. https://dx.doi.org/10.2305/IUCN.UK.2020- 3.RLTS.T103815544A182516621.en
Geospiza psittacula	Large tree finch	1837	Endemic	U		U			LC				LC	LC			LC			VU	VU				VU			BirdLife International. 2021. Geospiza psittacula. The IUCN Red List of Threatened Species 2021: e.T22723768A182382400. https://dx.doi.org/10.2305/IUCN.UK.2021- 3.RLTS.T22723768A182382400.en
Geospiza septentrionalis	Vampire ground finch	1899	Endemic																		VU	VU				VU		BirdLife International. 2022. Geospiza septentrionalis. The IUCN Red List of Threatened Species 2022: e.T103815245A182414024. https://dx.doi.org/10.2305/IUCN.UK.2022- 1.RLTS.T103815245A182414024.en
Larus fuliginosus	Lava gull	1841	Endemic	VU	VU	VU			VU		VU		VU		VU		VU				VU		VU					BirdLife International. 2018. Larus fuliginosus. The IUCN Red List of Threatened Species 2018: e.T22694452A132552501. http://dx.doi.org/10.2305/IUCN.UK.2018- 2.RLTS.T22694452A132552501.en
Laterallus spilonota	Galápagos rail	1841	Endemic	U		VU			VU		VU		VU				VU		VU		VU				VU			BirdLife International. 2020. Laterallus spilonota. The IUCN Red List of Threatened Species 2020: e.T22692366A181476400. https://dx.doi.org/10.2305/IUCN.UK.2020- 3.RLTS.T22692366A181476400.en
Mimus macdonaldi	Española Mockingbird	1890	Endemic	U		VU			VU			VU	VU				VU				VU				VU			BirdLife International. 2020. Mimus macdonaldi. The IUCN Red List of Threatened Species 2020: e.T22711070A182738354. https://dx.doi.org/10.2305/IUCN.UK.2020- 3.RLTS.T22711070A182738354.en
Mimus melanotis	San Cristóbal mockingbird	1837	Endemic	U		U			LC		EN		EN				EN	EN			EN				NT			BirdLife International. 2020. Mimus melanotis. The IUCN Red List of Threatened Species 2020: e.T22711078A180990415. https://dx.doi.org/10.2305/IUCN.UK.2020- 3.RLTS.T22711078A180990415.en
Mimus trifasciatus	Floreana mockingbird	1837	Endemic	EN	EN	EN			EN				CR	CR	CR		CR	CR		CR	CR	EN	EN					BirdLife International. 2018. Mimus trifasciatus. The IUCN Red List of Threatened Species 2018: e.T22711063A132093428. http://dx.doi.org/10.2305/IUCN.UK.2018- 2.RLTS.T22711063A132093428.en
Nannopterum harrisi	Flightless cormorant	1898	Endemic	VU	VU	EN			EN	EN			EN		EN	VU	VU	VU			VU	VU	VU					BirdLife International. 2018. Nannopterum harrisi. The IUCN Red List of Threatened Species 2018: e.T22696756A133546087. Accessed on 09 May 2023.
Phoebastria irrorata	Waved albatross	1883	Endemic	U		VU		VU	VU	VU		CR	CR	CR	CR		CR	CR	CR	CR	CR	CR	CR					BirdLife International. 2018. Phoebastria irrorata. The IUCN Red List of Threatened Species 2018: e.T22698320A132641638. http://dx.doi.org/10.2305/IUCN.UK.2018- 2.RLTS.T22698320A132641638.en
Progne modesta	Galápagos martin	1837	Endemic	NR		NR			NR	VU			VU				EN				EN				EN			BirdLife International. 2020. Progne modesta. The IUCN Red List of Threatened Species 2020: e.T22731986A182672786. https://dx.doi.org/10.2305/IUCN.UK.2020- 3.RLTS.T22731986A182672786.en
Pterodroma phaeopygia	Galápagos petrel	1876	Endemic	CR	CR	CR			CR		CR	CR	CR	CR	CR	CR	CR	CR		CR	CR	CR	CR					BirdLife International. 2018. Pterodroma phaeopygia. The IUCN Red List of Threatened Species 2018: e.T22698020A132619647. http://dx.doi.org/10.2305/IUCN.UK.2018- 2.RLTS.T22698020A132619647.en
Pyrocephalus nanus	Little Vermilion Flycatcher	1838	Endemic																		VU							BirdLife International. 2017. Pyrocephalus nanus. The IUCN Red List of Threatened Species 2017: e.T103682926A119555197. http://dx.doi.org/10.2305/IUCN.UK.2017- 3.RLTS.T103682926A119555197.en
Spheniscus mendiculus	Galápagos penguin	1871	Endemic	VU	VU	EN			EN			EN	EN		EN		EN				EN		EN		EN			BirdLife International. 2020. Spheniscus mendiculus. The IUCN Red List of Threatened Species 2020: e.T22697825A182729677. https://dx.doi.org/10.2305/IUCN.UK.2020- 3.RLTS.T22697825A182729677.en
Zenaida galapagoensis	Galápagos dove	1841	Endemic	U		U			LC				LC	LC			LC				LC				NT			BirdLife International. 2020. Zenaida galapagoensis. The IUCN Red List of Threatened Species 2020: e.T22690758A157400314. https://dx.doi.org/10.2305/IUCN.UK.2020- 3.RLTS.T22690758A157400314.en
Ardenna grisea	Sooty shearwater	1789	Vagrant	U		U			NT				NT		NT		NT				NT	NT	NT	NT				BirdLife International. 2019. Ardenna grisea. The IUCN Red List of Threatened Species 2019: e.T22698209A154440143. https://dx.doi.org/10.2305/IUCN.UK.2019- 3.RLTS.T22698209A154440143.en
Hydrobates leucorhous	Leach's Storm-petrel	1818	Vagrant																				VU
Procellaria parkinsoni	Black petrel	1862	Vagrant	VU	VU	VU			VU	VU		VU	VU		VU		VU				VU	VU						BirdLife International. 2018. Procellaria parkinsoni. The IUCN Red List of Threatened Species 2018: e.T22698150A132629374. http://dx.doi.org/10.2305/IUCN.UK.2018- 2.RLTS.T22698150A132629374.en

## Sheet: Fish
Scientific name	Common name	First described	Origin	IUCN Assessment Year
				1994	1996	2000	2002	2003	2004	2005	2006	2007	2008	2009	2010	2011	2012	2013	2014	2015	2016	2017	2018	2019	2020	2021		IUCN CITATION - accessed June 12, 2023
Sphyrna lewini	Scalloped hammerhead	1834	Native			NT								EN									CR					Rigby, C.L., Dulvy, N.K., Barreto, R., Carlson, J., Fernando, D., Fordham, S., Francis, M.P., Herman, K., Jabado, R.W., Liu, K.M., Marshall, A., Pacoureau, N., Romanov, E., Sherley, R.B. & Winker, H. 2019. Sphyrna lewini. The IUCN Red List of Threatened Species 2019: e.T39385A2918526. Accessed on 12 June 2023.
Alopias pelagicus	Smalltooth thresher shark	1935	Native											VU									EN					Rigby, C.L., Barreto, R., Carlson, J., Fernando, D., Fordham, S., Francis, M.P., Herman, K., Jabado, R.W., Liu, K.M., Marshall, A., Pacoureau, N., Romanov, E., Sherley, R.B. & Winker, H. 2019. Alopias pelagicus. The IUCN Red List of Threatened Species 2019: e.T161597A68607857. https://dx.doi.org/10.2305/IUCN.UK.2019-3.RLTS.T161597A68607857.en. Accessed on 12 June 2023.
Alopias superciliosus	Big eye thresher shark	1841	Native											VU									EN					Rigby, C.L., Barreto, R., Carlson, J., Fernando, D., Fordham, S., Francis, M.P., Herman, K., Jabado, R.W., Liu, K.M., Marshall, A., Pacoureau, N., Romanov, E., Sherley, R.B. & Winker, H. 2019. Alopias superciliosus. The IUCN Red List of Threatened Species 2019: e.T161696A894216. https://dx.doi.org/10.2305/IUCN.UK.2019-3.RLTS.T161696A894216.en. Accessed on 12 June 2023.
Bathygobius lineatus	Galápagos Frillfin	1861	Endemic									VU																Van Tassell, J. & Findley, L. 2010. Bathygobius lineatus. The IUCN Red List of Threatened Species 2010: e.T154657A4599309. https://dx.doi.org/10.2305/IUCN.UK.2010-4.RLTS.T154657A4599309.en. Accessed on 12 June 2023.
Carcharhinus longimanus	Oceanic whitetip shark	1841	Native			NT					VU									VU			CR					Rigby, C.L., Barreto, R., Carlson, J., Fernando, D., Fordham, S., Francis, M.P., Herman, K., Jabado, R.W., Liu, K.M., Marshall, A., Pacoureau, N., Romanov, E., Sherley, R.B. & Winker, H. 2019. Carcharhinus longimanus. The IUCN Red List of Threatened Species 2019: e.T39374A2911619. https://dx.doi.org/10.2305/IUCN.UK.2019-3.RLTS.T39374A2911619.en. Accessed on 12 June 2023.
Carcharhinus plumbeus	Sandbar shark	1827	Native		VU	NT								VU											EN			Rigby, C.L., Derrick, D., Dicken, M., Harry, A.V., Pacoureau, N. & Simpfendorfer, C. 2021. Carcharhinus plumbeus. The IUCN Red List of Threatened Species 2021: e.T3853A2874370. https://dx.doi.org/10.2305/IUCN.UK.2021-2.RLTS.T3853A2874370.en. Accessed on 12 June 2023.
Centrophorus squamosus	Leafscale gulper shark	1788	Native					VU																EN				Finucci, B., Bineesh, K.K., Cheok, J., Cotton, C.F., Dharmadi, Kulka, D.W., Neat, F.C., Pacoureau, N., Rigby, C.L., Tanaka, S. & Walker, T.I. 2020. Centrophorus squamosus. The IUCN Red List of Threatened Species 2020: e.T41871A68614964. https://dx.doi.org/10.2305/IUCN.UK.2020-3.RLTS.T41871A68614964.en. Accessed on 12 June 2023.
Hippocampus ingens	Giant seahorse	1858	Native		VU			VU									VU				VU							Pollom, R. 2017. Hippocampus ingens. The IUCN Red List of Threatened Species 2017: e.T10072A54905720. https://dx.doi.org/10.2305/IUCN.UK.2017-3.RLTS.T10072A54905720.en. Accessed on 12 June 2023.
Isurus oxyrinchus	Shortfin mako	1810	Native			NT								VU									EN					Rigby, C.L., Barreto, R., Carlson, J., Fernando, D., Fordham, S., Francis, M.P., Jabado, R.W., Liu, K.M., Marshall, A., Pacoureau, N., Romanov, E., Sherley, R.B. & Winker, H. 2019. Isurus oxyrinchus. The IUCN Red List of Threatened Species 2019: e.T39341A2903170. https://dx.doi.org/10.2305/IUCN.UK.2019-1.RLTS.T39341A2903170.en. Accessed on 12 June 2023.
Mycteroperca olfax	Sailfin grouper (bacalao)	1840	Native		VU							VU	VU							VU	VU							Erisman, B. & Craig, M.T. 2018. Mycteroperca olfax. The IUCN Red List of Threatened Species 2018: e.T14051A100466495. https://dx.doi.org/10.2305/IUCN.UK.2018-2.RLTS.T14051A100466495.en. Accessed on 12 June 2023.
Odontaspis ferox	Small-tooth sand tiger shark	1810	Native					DD						VU						VU								Graham, K.J., Pollard, D.A., Gordon, I., Williams, S., Flaherty, A.A., Fergusson, I. & Dicken, M. 2016. Odontaspis ferox (errata version published in 2016). The IUCN Red List of Threatened Species 2016: e.T41876A103433002. https://dx.doi.org/10.2305/IUCN.UK.2016-1.RLTS.T41876A2957320.en. Accessed on 12 June 2023.
Rhincodon typus	Whale shark	1828	Native	I	DD	VU				VU											EN							Pierce, S.J. & Norman, B. 2016. Rhincodon typus. The IUCN Red List of Threatened Species 2016: e.T19488A2365291. https://dx.doi.org/10.2305/IUCN.UK.2016-1.RLTS.T19488A2365291.en. Accessed on 12 June 2023.
Triakis maculata	Smooth hound	1867	Native									VU												CR				Dulvy, N.K., Acuña, E., Bustamante, C., Herman, K. & Velez-Zuazo, X. 2020. Triakis maculata. The IUCN Red List of Threatened Species 2020: e.T63130A124461743. https://dx.doi.org/10.2305/IUCN.UK.2020-3.RLTS.T63130A124461743.en. Accessed on 12 June 2023.
Xenichthys agassizii	White salema	1876	Endemic									VU																Allen, G., Robertson, R., Rivera, F., Edgar, G., Merlen, G. 2010. Xenichthys agassizii. The IUCN Red List of Threatened Species 2010: e.T183690A8159256. https://dx.doi.org/10.2305/IUCN.UK.2010-3.RLTS.T183690A8159256.en. Accessed on 12 June 2023.
Xyrichtys victori	Peacock razorfish	1992	Endemic									VU																Victor, B., Gerry, A. 2010. Xyrichtys victori. The IUCN Red List of Threatened Species 2010: e.T183305A8090443. https://dx.doi.org/10.2305/IUCN.UK.2010-3.RLTS.T183305A8090443.en. Accessed on 12 June 2023.
Aetobatus narinari	Whitespotted eagle ray	1790	Native																						EN			Dulvy, N.K., Carlson, J., Charvet, P., Ajemian, M.J., Bassos-Hull, K, Blanco-Parra, MP, Chartrain, E., Derrick, D., Dia, M., Diop, M., Doherty, P., Dossa, J., De Bruyne, G., Herman, K., Leurs, G.H.L., Mejía-Falla, P.A., Navia, A.F., Pacoureau, N., Pérez Jiménez, J.C., Pires, J.D., Seidu, I., Soares, A.-L., Tamo, A., VanderWright, W.J. & Williams, A.B. 2021. Aetobatus narinari (amended version of …
Carcharhinus albimarginatus	Silvertip shark	1837	Vagrant											NT							VU							Espinoza, M., González-Medina, E., Dulvy, N.K. & Pillans, R.D. 2021. Carcharhinus albimarginatus (amended version of 2016 assessment). The IUCN Red List of Threatened Species 2021: e.T161526A205781867. https://dx.doi.org/10.2305/IUCN.UK.2021-3.RLTS.T161526A205781867.en. Accessed on 12 June 2023.
Carcharhinus falciformis	Silky shark	1839	Native			LC								NT							NT	VU						Rigby, C.L., Sherman, C.S., Chin, A. & Simpfendorfer, C. 2021. Carcharhinus falciformis (amended version of 2017 assessment). The IUCN Red List of Threatened Species 2021: e.T39370A205782570. https://dx.doi.org/10.2305/IUCN.UK.2021-3.RLTS.T39370A205782570.en. Accessed on 12 June 2023.
Carcharhinus galapagensis	Galápagos shark	1905	Native					NT															LC					Kyne, P.M., Barreto, R., Carlson, J., Fernando, D., Fordham, S., Francis, M.P., Herman, K., Jabado, R.W., Liu, K.M., Pacoureau, N., Romanov, E. & Sherley, R.B. 2019. Carcharhinus galapagensis. The IUCN Red List of Threatened Species 2019: e.T41736A2954286. https://dx.doi.org/10.2305/IUCN.UK.2019-3.RLTS.T41736A2954286.en. Accessed on 12 June 2023.
Carcharhinus limbatus	Blacktip shark	1839	Native		VU	NT								NT											VU			Rigby, C.L., Carlson, J., Chin, A., Derrick, D., Dicken, M. & Pacoureau, N. 2021. Carcharhinus limbatus. The IUCN Red List of Threatened Species 2021: e.T3851A2870736. https://dx.doi.org/10.2305/IUCN.UK.2021-2.RLTS.T3851A2870736.en. Accessed on 12 June 2023.
Galeocerdo cuvier	Tiger shark	1822	Native			NT								NT									NT					Ferreira, L.C. & Simpfendorfer, C. 2019. Galeocerdo cuvier. The IUCN Red List of Threatened Species 2019: e.T39378A2913541. https://dx.doi.org/10.2305/IUCN.UK.2019-1.RLTS.T39378A2913541.en. Accessed on 12 June 2023.
Mobula munkiana	Smoothtip mobula	1987	Native								NT												VU					Marshall, A., Barreto, R., Carlson, J., Fernando, D., Fordham, S., Francis, M.P., Herman, K., Jabado, R.W., Liu, K.M., Rigby, C.L. & Romanov, E. 2022. Mobula munkiana (amended version of 2019 assessment). The IUCN Red List of Threatened Species 2022: e.T60198A214407880. https://dx.doi.org/10.2305/IUCN.UK.2022-1.RLTS.T60198A214407880.en. Accessed on 12 June 2023.
Mustelus mento	Speckled smoothhound	1877	Native									NT												CR				Dulvy, N.K., Acuña, E., Bustamante, C., Concha, F., Herman, K. & Velez-Zuazo, X. 2021. Mustelus mento (amended version of 2020 assessment). The IUCN Red List of Threatened Species 2021: e.T63128A203720849. https://dx.doi.org/10.2305/IUCN.UK.2021-2.RLTS.T63128A203720849.en. Accessed on 12 June 2023.
Prionace glauca	Blue shark	1758	Native			NT								NT									NT					Rigby, C.L., Barreto, R., Carlson, J., Fernando, D., Fordham, S., Francis, M.P., Herman, K., Jabado, R.W., Liu, K.M., Marshall, A., Pacoureau, N., Romanov, E., Sherley, R.B. & Winker, H. 2019. Prionace glauca. The IUCN Red List of Threatened Species 2019: e.T39381A2915850. https://dx.doi.org/10.2305/IUCN.UK.2019-3.RLTS.T39381A2915850.en. Accessed on 12 June 2023.
Rhinoptera steindachneri	Golden cownose ray	1891	Native								NT													NT				Pollom, R., Avalos, C., Bizzarro, J., Burgos-Vázquez, M.I., Cevallos, A., Espinoza, M., González, A., Herman, K., Mejía-Falla, P.A., Morales-Saldaña, J.M., Navia, A.F., Pérez Jiménez, J.C., Sosa-Nishizaki, O. & Velez-Zuazo, X. 2020. Rhinoptera steindachneri. The IUCN Red List of Threatened Species 2020: e.T60130A124442442. https://dx.doi.org/10.2305/IUCN.UK.2020-3.RLTS.T60130A124442442.en. Access…
Triaenodon obesus	Whitetip reef shark	1837	Native			NT								NT											VU			Simpfendorfer, C., Yuneni, R.R., Tanay, D., Seyha, L., Haque, A.B., Bineesh, K.K., , D., Bin Ali, A., Gautama, D.A., Maung, A., Sianipar, A., Utzurrum, J.A.T. & Vo, V.Q. 2020. Triaenodon obesus. The IUCN Red List of Threatened Species 2020: e.T39384A173436715. https://dx.doi.org/10.2305/IUCN.UK.2020-3.RLTS.T39384A173436715.en. Accessed on 12 June 2023.
